# Supplementary material
Source: Springer Nature journal article supplement (https://www.springermedizin.de/resource/supplementary/12961_2012_271_MOESM1_ESM.pdf/9570928)

## Levels of impact\*

### Advancing Knowledge

- New results, advances in knowledge, confirmation or refusal of prior findings, as well as the dissemination of documents.

### Capacity building

- Development and improvement (real or expected) of research skills in individuals, groups, infrastructures or geographical areas.

### Informed decision-making

- Influence of research results on the health-related decision-making (where health is broadly defined to include health care, public health, social care, and other health-related decisions such as environmental health); research decision-making; and general public decision-making.

### Health and social

- Influence of research results on the improvement of health and social wellbeing (health status, health determinants, healthcare systems, or others).

### Broad economic

- Economic influences created by research results as a result of benefitting society.

## Phases of the logic model

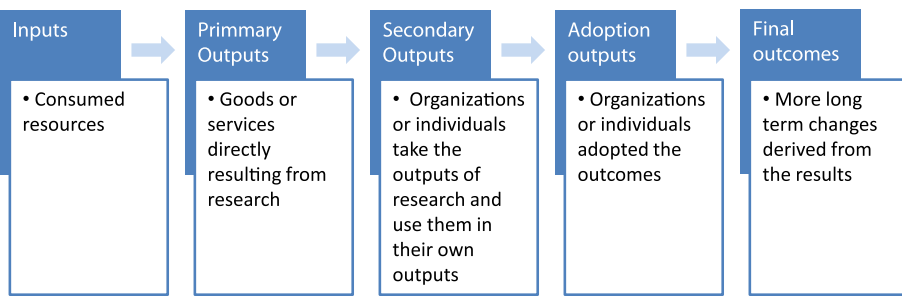

Supplement: MOESM1 [file 9570928]
